# Supplementary material
Source: publisher site journal article supplement (https://www.dovepress.com/article/252664)
Supplement: Supplementary file 1 [file get_supplementary_file.php]

**Supplementary Materials**

Supplementary Material Table S1 World Health Organization Classification criteria for myelosuppression grading of anticancer drugs

|  | Myelosuppression grading | | | | |
| --- | --- | --- | --- | --- | --- |
| 0 | I | II | III | IV |
| Hemoglobin (g/L) | > 110 | 95 - 109 | 80 - 94 | 65 - 79 | < 65 |
| Leukocytes (x10^9/L) | > 4.0 | 3.0 - 3.9 | 2.0 - 2.9 | 1.0 - 1.9 | < 1.0 |
| Granulocytes (x10^9/L) | > 2.0 | 1.5 - 1.9 | 1.0 - 1.4 | 0.5 - 0.9 | < 0.5 |
| Platelets (x10^9/L) | > 100 | 75 - 99 | 50 - 74 | 25 - 49 | < 25 |
| Haemorrhage | None | Petechiae | Mild blood loss | Gross blood loss | Debilitating blood loss |

Supplementary Material Table S2 The chemotherapy protocol profile and therapeutic outcomes of low-risk GTN patients in both groups

|  | Group A (n = 248) | Group B (n = 71) | p |
| --- | --- | --- | --- |
| Chemotherapy protocol |  |  | < 0.001C |
| MTX* chemotherapy (N, %) | 112 (45.2%) | 53 (74.6%) |  |
| second-line chemotherapy (N, %) | 136 (54.8%) | 18 (25.4%) |  |
| MTX* + ACTD† (N, %) | 97 (39.1%) | 12 (16.9%) |
| MTX* + EMA-CO‡ (N, %) | 8 (3.2%) | 2 (2.8%) |
| MTX* + ACTD† + EMA-CO‡ (N, %) | 31 (12.5%) | 4 (5.6%) |
| switch to second-line therapy due to MTX* resistance (N, %) | 124 (50.0%) | 9 (12.7%) | < 0.001 C |
| switch to second-line therapy due to myelosuppression (N, %) | 4 (1.6%) | 7 (9.9%) | 0.003 F |
| switch to second-line therapy due to allergy (N, %) | 2 (0.8%) | 2 (2.8%) | 0.216 F |
| switch to second-line therapy due to hepatic dysfunction (N, %) | 4 (1.6%) | 0 (0%) | 0.579 F |
| switch to second-line therapy due to pleuritis and pleural effusion (N, %) | 2 (0.8%) | 0 (0%) | 1.000 F |
| Number of total chemotherapy courses§ | 7 [5,9] | 5 [4,7] | 0.001M |
| Number of MTX* chemotherapy courses§ | 4 [2,5] | 5 [3,6] | 0.001M |
| Primary remission in MTX* (N, %) | 112 (45.2%) | 53 (74.6%) | < 0.001 C |
| Sustained CR‖ (N, %) | 243 (98.0%) | 68 (95.8%) | 0.383 F |
| Relapse (N, %) | 5 (2.0%) | 3 (4.2%) | 0.383 F |

C – Chi-square test.

F – Fisher’s exact test.

M – Mann-Whitney U test.

* MTX – methotrexate.

† ACTD – dactinomycin.

‡ EMA-CO – etoposide, MTX, and ActD followed by cyclophosphamide and vincristine

§ Median and interquartile range

‖ CR – complete remission

Supplementary Material Table S3 The myelosuppression and treatment profile in both groups

|  | Group A (n = 248) | Group B (n = 71) |  |
| --- | --- | --- | --- |
| Myelosuppression grading |  |  |  |
| 0 | 117 (47.2%) | / |  |
| I | 83 (33.5%) | / |  |
| II | 48 (19.3%) | / |  |
| III | / | 52 (73.2%) |  |
| IV | / | 19 (26.8%) |  |
| Main type of myelosuppression |  |  | p |
| leukopenia | 106 (42.7%) | 70 (98.6%) | < 0.001C |
| neutropenia | 86 (34.7%) | 71 (100.0%) | < 0.001C |
| anemia | 76 (30.6%) | 36 (50.7%) | 0.002C |
| thrombocytopenia | 1 (0.4%) | 7 (9.9%) | < 0.001F |
| Treatment of myelosuppression |  |  | p |
| leukocyte-raising drugs or G-CSF* | 87 (35.1%) | 71 (100.0%) | < 0.001C |
| iron therapy or EPO† | 33 (13.3%) | 18 (25.4%) | 0.015C |
| TPO‡ | 5 (2.0%) | 10 (14.1%) | < 0.001F |
| blood transfusion | 0 (0.0%) | 1 (1.4%) | 0.223F |

C – Chi-square test.

F – Fisher’s exact test.

* G-CSF – granulocyte-colony stimulating factor.

† EPO – erythropoietin.

‡ TPO – thrombopoietin.

Supplementary Material Table S4. The comparison of AUC among pretreatment ALB, pretreatment Scr, number of MTX chemotherapy courses and their joint predictor.

|  | Difference | Z-value | p |
| --- | --- | --- | --- |
| Pretreatment ALB* vs. Pretreatment Scr† | 0.002 | 0.042 | 0.967 |
| Pretreatment ALB* vs. Number of MTX‡ chemotherapy courses | 0.004 | 0.070 | 0.944 |
| Pretreatment ALB* vs. Joint predictor | 0.108 | 2.922 | 0.004 |
| Pretreatment Scr† vs. Number of MTX‡ chemotherapy courses | 0.006 | 0.110 | 0.912 |
| Pretreatment Scr† vs. Joint predictor | 0.106 | 2.820 | 0.005 |
| Number of MTX‡ chemotherapy courses vs. Joint predictor | 0.111 | 2.801 | 0.005 |

* ALB – albumin.

† Scr –serum creatinine.

‡ MTX – methotrexate.
